# Supplementary material for: Multiscale method for modeling binding phenomena involving large objects: application to kinesin motor domains motion along microtubules
Source: PubMed Central journal article supplement (PMC4796874; doi:10.1038/srep23249), 2016-03-18
Supplement: srep23249-s1.pdf [file srep23249-s1.pdf]

## Supplementary Information

**Title:**

Multiscale method for modeling binding phenomena involving large objects: application to kinesin motor domains motion along microtubules

**Authors:**

Lin Li, Joshua Alper, Emil Alexov\*

**Video captions:**

**Movie 1:** Monte Carlo pathway for an N-kinesin motor (PDBID: 1vfv) along the microtubule.

**Movie 2:** Monte Carlo pathway for a C-kinesin motor (PDBID: 2h58) along the microtubule.

**Movie 3:** Monte Carlo pathway for Cin8 motor along the microtubule.

**Movie 4:** Monte Carlo pathway for a nanoparticle along the microtubule.
